# Supplementary material for: Heterologous expression of newly identified galectin-8 from sea urchin embryos produces recombinant protein with lactose binding specificity and anti-adhesive activity
Source: PubMed Central journal article supplement (PMC4671058; doi:10.1038/srep17665), 2015-12-07
Supplement: srep17665-s1.pdf [file srep17665-s1.pdf]

Heterologous expression of newly identified galectin-8 from sea urchin embryos produces recombinant protein with lactose binding specificity and anti-adhesive activity

Konstantinos Karakostis#, C. Costa#, F. Zito and V. Matranga\*

Institute of Biomedicine and Molecular Immunology “A. Monroy”,

National Research Council, Palermo, Italy

\*Corresponding author: [matranga@ibim.cnr.it](mailto:matranga@ibim.cnr.it)

# Equally contributed to this study

TABLE I - Members of the galectin family in invertebrates

| Name                                                                          | Species                                                   | type                                     | MW (kDa)                  | Cell types & tissues                                                                      | Function                                                                                                                      |
|-------------------------------------------------------------------------------|-----------------------------------------------------------|------------------------------------------|---------------------------|-------------------------------------------------------------------------------------------|-------------------------------------------------------------------------------------------------------------------------------|
| GALEC2a_SUBDO <sup>1</sup>                                                    | <i>Suberites domuncula</i><br>Porifera                    | tandem-repeat                            | 33,091                    | extracted from axial filaments<br>of the spicules                                         | spicule growth, biosilica deposition;<br>self-associate in the Ca <sup>2+</sup> presence;<br>co-precipitates with Silicatein. |
| CaL <sup>2</sup>                                                              | <i>Cinachyrella apion</i><br>Porifera                     | eight subunits<br>of<br>15.5 kDa         | 124                       | extracted and purified from<br>total animals                                              | induces cell death;<br>haemagglutinating activity towards human<br>erythrocytes of all ABO groups.                            |
| GCG <sup>3-5</sup>                                                            | <i>Geodia cydonium</i><br>Porifera                        | prototype<br>and<br>chimera<br>oligomers | 13,15,16<br><br>30,46, 62 | extracellular fluid of the<br>sponge                                                      | binding to terminal blood group A-related<br>saccharides on polylactosamine-type<br>glycans.                                  |
| HOL-30 <sup>6</sup>                                                           | <i>Halichondria okadai</i><br>Porifera                    | forming<br>dimers of<br>60KDa            | 30                        | extract from<br>homogenised<br>organisms                                                  | agglutinate rabbit and human erythrocytes.                                                                                    |
| Nematogalectin A e<br>Nematogalectin B <sup>7</sup>                           | <i>Hydra and Clytia</i><br>Cnidaria                       | prototype<br>forming trimer              | 28<br>120                 | proximal tubule (B) and<br>distal tubule (A)<br>(Desmonemes, stenoteles and<br>isorhizas) | nematocyst tubules differentiation.                                                                                           |
| OvGalBP <sup>8</sup>                                                          | <i>Onchocerca volvulus</i><br>Nematode ( <i>filaria</i> ) | tandem repeat                            | 32.5                      | adult female                                                                              | specifically bind IgE with a role in the<br>pathophysiology of human filarial infection.                                      |
| Hco-gal-1,<br>Tco-gal-2 <sup>9</sup><br>Hco-GAL-3a<br>Hco-gal-4 <sup>10</sup> | <i>Hemonchus contortus</i><br>Nematode                    | tandem repeat                            | 31-35                     | third stage larvae<br><br>all life cycle stages,<br>adult parasites                       | antigen of the sheep gastrointestinal nematode<br>parasite.                                                                   |
| Tci-gal-1 and -2 <sup>11</sup>                                                | <i>Teladorsagia circumcincta</i><br>Nematode              | tandem repeat                            | 31 – 33                   | third stage larvae                                                                        | antigen of the sheep gastrointestinal nematode<br>parasite .                                                                  |

|                                                                                                                            |                                                      |                                                                             |                                                     |                                                                                                                                                                         |                                                                                                                                                                                                                                                         |
|----------------------------------------------------------------------------------------------------------------------------|------------------------------------------------------|-----------------------------------------------------------------------------|-----------------------------------------------------|-------------------------------------------------------------------------------------------------------------------------------------------------------------------------|---------------------------------------------------------------------------------------------------------------------------------------------------------------------------------------------------------------------------------------------------------|
| N32, LEC-1<br>N16, LEC-6 <sup>12-14</sup><br><i>lec-2-5</i><br><i>lec-8-11</i><br>DC2.3a/LEC-12a<br>LEC-8 <sup>15-17</sup> | <i>Caenorhabditis</i><br><i>elegans</i><br>Nematode  | Tandem repeat<br><br>tandem repeat<br>chimera<br><br>prototype<br>prototype | 32<br>16<br><br>31-35<br><br>16-27<br>19,9<br><br>- | adult cuticle<br><br><br>-----<br><br>-----<br>-----<br><br>pharyngeal-intestinal valve<br>and intestinal-rectal valve,<br>weakly in intestine.                         | hypothesised role in the formation of tight and<br>insoluble epidermal layers.<br>recombinant for LEC-2-4 and LEC-8-11.<br><br>hemagglutinating activity<br>against rabbit erythrocytes.<br>host defense against bacterial infection by<br>competition. |
| Pl-Gal-8                                                                                                                   | <i>Paracentrotus lividus</i><br>Echinoidea           | tandem-repeat                                                               | 35                                                  | Embryonic endodermal cells<br>and secondary mesenchyme<br>cells.<br>Larvae sphincters and gut.                                                                          | hemoagglutination and<br>cell adhesion.                                                                                                                                                                                                                 |
| CvGal <sup>18</sup><br>CgGal <sup>19</sup>                                                                                 | <i>Crassostrea virginica</i><br>Bivalvia             | four CRD<br>130kDa<br><br>prototype                                         | 70,9<br><br>16,5                                    | hemocytes, palps, gills,<br>mantle, midgut, and rectal<br>tissues.<br>hemocytes, , mantle, gills,<br>digestive gland, gonad,<br>adductor muscle, heart, labial<br>palp. | cell-cell interactions;<br>host-pathogen interactions;<br>Immune system;<br>cell adhesion                                                                                                                                                               |
| AiGal <sup>20</sup>                                                                                                        | <i>Argopectens</i><br><i>irradians</i><br>Bivalvia   | four CRDs                                                                   | 61.5                                                | haemocytes                                                                                                                                                              | immune responses against bacterial infection                                                                                                                                                                                                            |
| SgGal-1 <sup>21</sup>                                                                                                      | <i>Solen</i><br><i>grandis</i><br>Bivalvia           | tandem repeat                                                               | 47.1                                                | hemocytes, gonad, mantle,<br>muscle,<br>gill and hepatopancreas                                                                                                         | pattern recognition receptors (PRRs) in<br>pathogen recognition                                                                                                                                                                                         |
| PoGal1 <sup>22</sup><br>PoGal2<br>PfGal                                                                                    | <i>Pinctada</i><br><i>fucata</i><br>Bivalvia         | four CRDs<br><br>tandem-repeat<br>tandem-repeat                             | 63.4<br><br>38.1<br>38,09                           | up-regulated in digestive<br>gland, mantle, haemocyte,<br>gonad and intestine after<br><i>Vibrio alginolyticus</i> infection.                                           | innate immune response.<br>constitutive and inducible acute-phase protein<br>involved in the innate immune response .<br><br>immune response against bacterial infection<br>and clearance of bacterial pathogens.                                       |
| McGal <sup>23</sup>                                                                                                        | <i>Ruditapes</i><br><i>philippinarum</i><br>Bivalvia | tandem repeat                                                               | 33.9                                                | heart, mantle, foot, adductor,<br>palp, siphon tissues and<br>hemocytes                                                                                                 | up-regulated after challenge with <i>Perkinsus</i><br><i>olseni</i> or <i>Vibrio tapetis</i> binding to their surface<br>.                                                                                                                              |

|                                         |                                            |                  |              |                                                                                                 |                                                                                                                           |
|-----------------------------------------|--------------------------------------------|------------------|--------------|-------------------------------------------------------------------------------------------------|---------------------------------------------------------------------------------------------------------------------------|
| BgGal <sup>24</sup>                     | <i>Biomphalaria glabrata</i><br>Gastropoda | tandem-repeat    | 32,0         | embryonic cell line (Bge),<br>circulating haemocytes                                            | pattern recognition receptor for<br>pathogens( <i>Schistosoma mansoni</i> ).                                              |
| CiLgals-a<br>CiLgals-b <sup>25,26</sup> | <i>Ciona intestinalis</i><br>Ascidiacea    | Tandem repeat    | 32.9<br>37.1 | pharynx extracts and<br>hemocytes                                                               | Inflammatory responses more probable for<br>CiLgals-a                                                                     |
| Dmgal <sup>27</sup>                     | <i>Drosophila melanogaster</i><br>Diptera  | tandem<br>repeat | 57,6         | Embryonic, larval, and adult<br>somatic and visceral<br>musculature, central nervous<br>system. | Innate immune system.                                                                                                     |
| PpGalec <sup>28</sup>                   | <i>Phlebotomus papatasi</i><br>Diptera     | tandem<br>repeat |              | larval and pupal stages of<br>development - midgut                                              | interaction with Leishmania protozoan<br>parasites and parasites adherence facilitation to<br>the midgut epithelial cells |
| OmGalec <sup>29</sup>                   | <i>Ornithodoros moubata</i> ,<br>Arachnida | tandem<br>repeat | 37,4         | all stages of the life cycle<br>adult hemocytes, midguts,<br>and reproductive organs            | immunity, interaction with pathogens, and<br>development                                                                  |

## Supplementary References

- 1 Schroder, H. C. *et al.* Co-expression and functional interaction of silicatein with galectin: matrix-guided formation of siliceous spicules in the marine demosponge *Suberites domuncula*. *The Journal of biological chemistry* **281**, 12001-12009, doi:10.1074/jbc.M512677200 (2006).
- 2 Medeiros, D. S. *et al.* A lactose specific lectin from the sponge *Cinachyrella apion*: purification, characterization, N-terminal sequences alignment and agglutinating activity on *Leishmania promastigotes*. *Comparative biochemistry and physiology. Part B, Biochemistry & molecular biology* **155**, 211-216, doi:10.1016/j.cbpb.2009.10.016 (2010).
- 3 Pfeifer, K. *et al.* S-type lectins occur also in invertebrates: high conservation of the carbohydrate recognition domain in the lectin genes from the marine sponge *Geodia cydonium*. *Glycobiology* **3**, 179-184 (1993).
- 4 Wagner-Hulsmann, C. *et al.* A galectin links the aggregation factor to cells in the sponge (*Geodia cydonium*) system. *Glycobiology* **6**, 785-793 (1996).
- 5 Stalz, H. *et al.* The *Geodia cydonium* galectin exhibits prototype and chimera-type characteristics and a unique sequence polymorphism within its carbohydrate recognition domain. *Glycobiology* **16**, 402-414, doi:10.1093/glycob/cwj086 (2006).
- 6 Kawsar, S. M. *et al.* Isolation, purification, characterization and glycan-binding profile of a d-galactoside specific lectin from the marine sponge, *Halichondria okadai*. *Comparative biochemistry and physiology. Part B, Biochemistry & molecular biology* **150**, 349-357, doi:10.1016/j.cbpb.2008.04.004 (2008).
- 7 Hwang, J. S. *et al.* Nematogalectin, a nematocyst protein with GlyXY and galectin domains, demonstrates nematocyte-specific alternative splicing in *Hydra*. *Proceedings of the National Academy of Sciences of the United States of America* **107**, 18539-18544, doi:10.1073/pnas.1003256107 (2010).
- 8 Klion, A. D. & Donelson, J. E. OvGalBP, a filarial antigen with homology to vertebrate galactoside-binding proteins. *Molecular and biochemical parasitology* **65**, 305-315 (1994).

- 9 Greenhalgh, C. J., Beckham, S. A. & Newton, S. E. Galectins from sheep gastrointestinal nematode parasites are highly conserved. *Molecular and biochemical parasitology* **98**, 285-289 (1999).
- 10 Greenhalgh, C. J., Loukas, A., Donald, D., Nikolaou, S. & Newton, S. E. A family of galectins from *Haemonchus contortus*. *Molecular and biochemical parasitology* **107**, 117-121 (2000).
- 11 Newton, S. E., Monti, J. R., Greenhalgh, C. J., Ashman, K. & Meeusen, E. N. cDNA cloning of galectins from third stage larvae of the parasitic nematode *Teladorsagia circumcincta*. *Molecular and biochemical parasitology* **86**, 143-153 (1997).
- 12 Ahmed, H. *et al.* Novel carbohydrate specificity of the 16-kDa galectin from *Caenorhabditis elegans*: binding to blood group precursor oligosaccharides (type 1, type 2, Talpha, and Tbeta) and gangliosides. *Glycobiology* **12**, 451-461 (2002).
- 13 Hirabayashi, J., Satoh, M., Ohyama, Y. & Kasai, K. Purification and characterization of beta-galactoside-binding proteins from *Caenorhabditis elegans*. *Journal of biochemistry* **111**, 553-555 (1992).
- 14 Hirabayashi, J., Ubukata, T. & Kasai, K. Purification and molecular characterization of a novel 16-kDa galectin from the nematode *Caenorhabditis elegans*. *The Journal of biological chemistry* **271**, 2497-2505 (1996).
- 15 Nemoto-Sasaki, Y. *et al.* *Caenorhabditis elegans* galectins LEC-1-LEC-11: structural features and sugar-binding properties. *Biochimica et biophysica acta* **1780**, 1131-1142, doi:10.1016/j.bbagen.2008.07.003 (2008).
- 16 Nemoto-Sasaki, Y. *et al.* The DC2.3 gene in *Caenorhabditis elegans* encodes a galectin that recognizes the galactosebeta1-->4fucose disaccharide unit. *Biological & pharmaceutical bulletin* **34**, 1635-1639 (2011).
- 17 Ideo, H. *et al.* A *Caenorhabditis elegans* glycolipid-binding galectin functions in host defense against bacterial infection. *The Journal of biological chemistry* **284**, 26493-26501, doi:10.1074/jbc.M109.038257 (2009).
- 18 Tasumi, S. & Vasta, G. R. A galectin of unique domain organization from hemocytes of the Eastern oyster (*Crassostrea virginica*) is a receptor for the protistan parasite *Perkinsus marinus*. *Journal of immunology* **179**, 3086-3098 (2007).
- 19 Yamaura, K., Takahashi, K. G. & Suzuki, T. Identification and tissue expression analysis of C-type lectin and galectin in the Pacific oyster, *Crassostrea gigas*. *Comparative biochemistry and physiology. Part B, Biochemistry & molecular biology* **149**, 168-175, doi:10.1016/j.cbpb.2007.09.004 (2008).
- 20 Song, B. *et al.* [Isoflurane-based intravenous and inhalation combined anesthesia versus low-dose-ketamine-based total intravenous anesthesia for valvuloplasty in minipigs]. *Sichuan da xue xue bao. Yi xue ban = Journal of Sichuan University. Medical science edition* **41**, 858-861 (2010).
- 21 Yang, J. *et al.* A sigma-class glutathione S-transferase from *Solen grandis* that responded to microorganism glycan and organic contaminants. *Fish & shellfish immunology* **32**, 1198-1204, doi:10.1016/j.fsi.2012.03.010 (2012).
- 22 Zhang, D. *et al.* A multidomain galectin involved in innate immune response of pearl oyster *Pinctada fucata*. *Developmental and comparative immunology* **35**, 1-6, doi:10.1016/j.dci.2010.08.007 (2011).
- 23 Kim, J. Y., Kim, Y. M., Cho, S. K., Choi, K. S. & Cho, M. Noble tandem-repeat galectin of Manila clam *Ruditapes philippinarum* is induced upon infection with the protozoan parasite *Perkinsus olseni*. *Developmental and comparative immunology* **32**, 1131-1141, doi:10.1016/j.dci.2008.03.002 (2008).
- 24 Yoshino, T. P., Dinguirard, N., Kunert, J. & Hokke, C. H. Molecular and functional characterization of a tandem-repeat galectin from the freshwater snail *Biomphalaria*

- glabrata, intermediate host of the human blood fluke *Schistosoma mansoni*. *Gene* **411**, 46-58, doi:10.1016/j.gene.2008.01.003 (2008).
- 25 Satou, Y. *et al.* A cDNA resource from the basal chordate *Ciona intestinalis*. *Genesis* **33**, 153-154, doi:10.1002/gene.10119 (2002).
- 26 Vizzini, A. *et al.* Inducible galectins are expressed in the inflamed pharynx of the ascidian *Ciona intestinalis*. *Fish & shellfish immunology* **32**, 101-109, doi:10.1016/j.fsi.2011.10.028 (2012).
- 27 Pace, K. E. *et al.* Characterization of a novel *Drosophila melanogaster* galectin. Expression in developing immune, neural, and muscle tissues. *The Journal of biological chemistry* **277**, 13091-13098, doi:10.1074/jbc.M112105200 (2002).
- 28 Kamhawi, S. *et al.* A role for insect galectins in parasite survival. *Cell* **119**, 329-341 (2004).
- 29 Huang, X. *et al.* Molecular characterization and oligosaccharide-binding properties of a galectin from the argasid tick *Ornithodoros moubata*. *Glycobiology* **17**, 313-323, doi:10.1093/glycob/cwl070 (2007).
